CORRECTION

# Correction: Curcumin Modulates the Inflammatory Response and Inhibits Subsequent Fibrosis in a Mouse Model of Viral-induced Acute Respiratory Distress Syndrome

Sreedevi Avasarala, Fangfang Zhang, Guangliang Liu, Ruixue Wang, Steven D. London, Lucille London

In [Fig 4A](#), as the result of an error in preparation of the Western blot images, incorrect bands were shown for  $\beta$ -actin, saline-treated  $\alpha$ -SMA and saline-treated Tenascin. Bands labelled  $\beta$ -actin were taken from the  $\alpha$ -SMA blot by mistake; the band labelled saline-treated  $\alpha$ -SMA was taken from a different lane showing curcumin-treated lysate in the same blot; the band labelled saline-treated Tenascin was from a different blot.

Additionally,  $\alpha$ -SMA, E-cadherin and  $\beta$ -actin expression were measured on a single blot that was stripped and re-probed multiple times, while Tenascin (TN-C) was probed on a different blot in an independent experiment with  $\beta$ -actin antibodies used concurrently. The  $\beta$ -actin bands from the independent Tenascin blot were not shown in the original [Fig 4A](#).

Here we provide a revised [Fig 4](#) showing the correct  $\beta$ -actin and  $\alpha$ -SMA bands, and a revised [Fig 4](#) legend. The original uncropped blot images are provided as a supplementary file, with arrows indicating the correct sized bands. Multiple exposures are provided for the E-cadherin blot. The revised figure has been prepared using lanes 1, 6, and 7 of the original E-cadherin blot to match the lanes used from the  $\beta$ -actin and  $\alpha$ -SMA blots; the original published figure used lanes 1, 4, and 5 (lanes 4 and 6 both used lysates from untreated mice on day 14; lanes 5 and 7 both used lysates from curcumin-treated mice on day 14).

The errors in the original figure do not affect the results demonstrated in [Fig 4A](#), which are further confirmed by the additional methods shown in [Fig 4B and 4C](#).

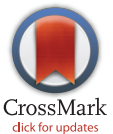

**OPEN ACCESS**

**Citation:** Avasarala S, Zhang F, Liu G, Wang R, London SD, London L (2015) Correction: Curcumin Modulates the Inflammatory Response and Inhibits Subsequent Fibrosis in a Mouse Model of Viral-induced Acute Respiratory Distress Syndrome. PLoS ONE 10(8): e0134982. doi:10.1371/journal.pone.0134982

**Published:** August 4, 2015

**Copyright:** © 2015 Avasarala et al. This is an open access article distributed under the terms of the [Creative Commons Attribution License](#), which permits unrestricted use, distribution, and reproduction in any medium, provided the original author and source are credited.

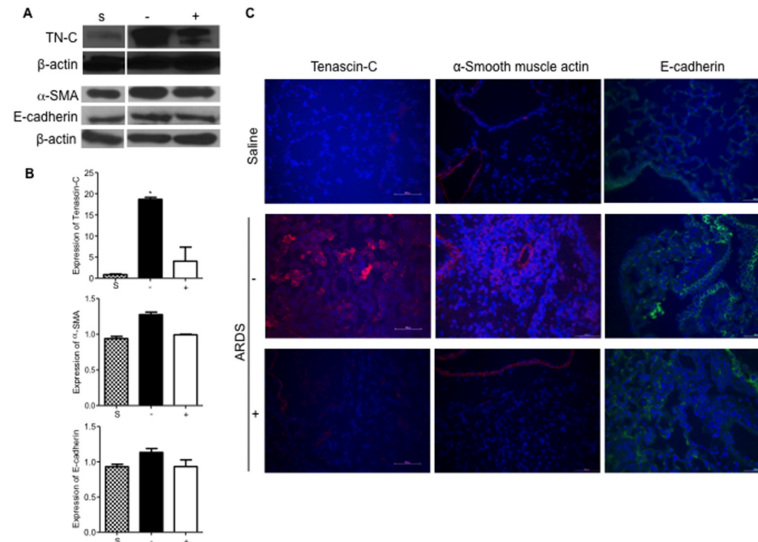

**Fig 4. Administration of curcumin reduces expression of the myofibroblast cell phenotype in reovirus 1/L-ALI/ARDS.** CBA/J mice were inoculated i.n. with 107 PFU reovirus 1/L and were either untreated (-) or treated (+) with 50 mg/kg curcumin by i.p. injection beginning 5 days prior to infection and daily, thereafter. (A) Western analysis from whole lung lysates for protein expression of TN-C, α-SMA, and E-cadherin from either saline (S), untreated (-), or curcumin-treated (+) reovirus 1/L-ALI/ARDS mice on day 14 post-inoculation. β-actin expression demonstrated equal loading (Independent blots for TN-C and α-SMA/E-cadherin). Representative of three mice per time point; (B) RNA was prepared from whole lung tissue on day 14 post-inoculation and the relative expression of TN-C, α-SMA, and E-cadherin was assessed by qRT-PCR from untreated (-, solid bars) or treated (+, open bars) reovirus 1/L-ALI/ARDS mice. Saline inoculated mice were used as controls (S, stippled bars). Histograms are the mean +/- S.D. of three mice per time point. \*p.

doi:10.1371/journal.pone.0134982.g001

## Supporting Information

**S1 File. Raw blots for Fig 4.**  
(PPTX)

## Reference

1. Avasarala S, Zhang F, Liu G, Wang R, London SD, London L (2013) Curcumin Modulates the Inflammatory Response and Inhibits Subsequent Fibrosis in a Mouse Model of Viral-induced Acute Respiratory Distress Syndrome. PLoS ONE 8(2): e57285. doi: [10.1371/journal.pone.0057285](https://doi.org/10.1371/journal.pone.0057285) PMID: [23437361](https://pubmed.ncbi.nlm.nih.gov/23437361/)
